# Supplementary material
Source: PubMed Central journal article supplement (PMC5360919)

Figure S1. Distribution of pairwise similarity at ITS for 38 strains of ant-associated Cyphellophoraceae, showing a drop of values at 0.99 but not at 0.97.

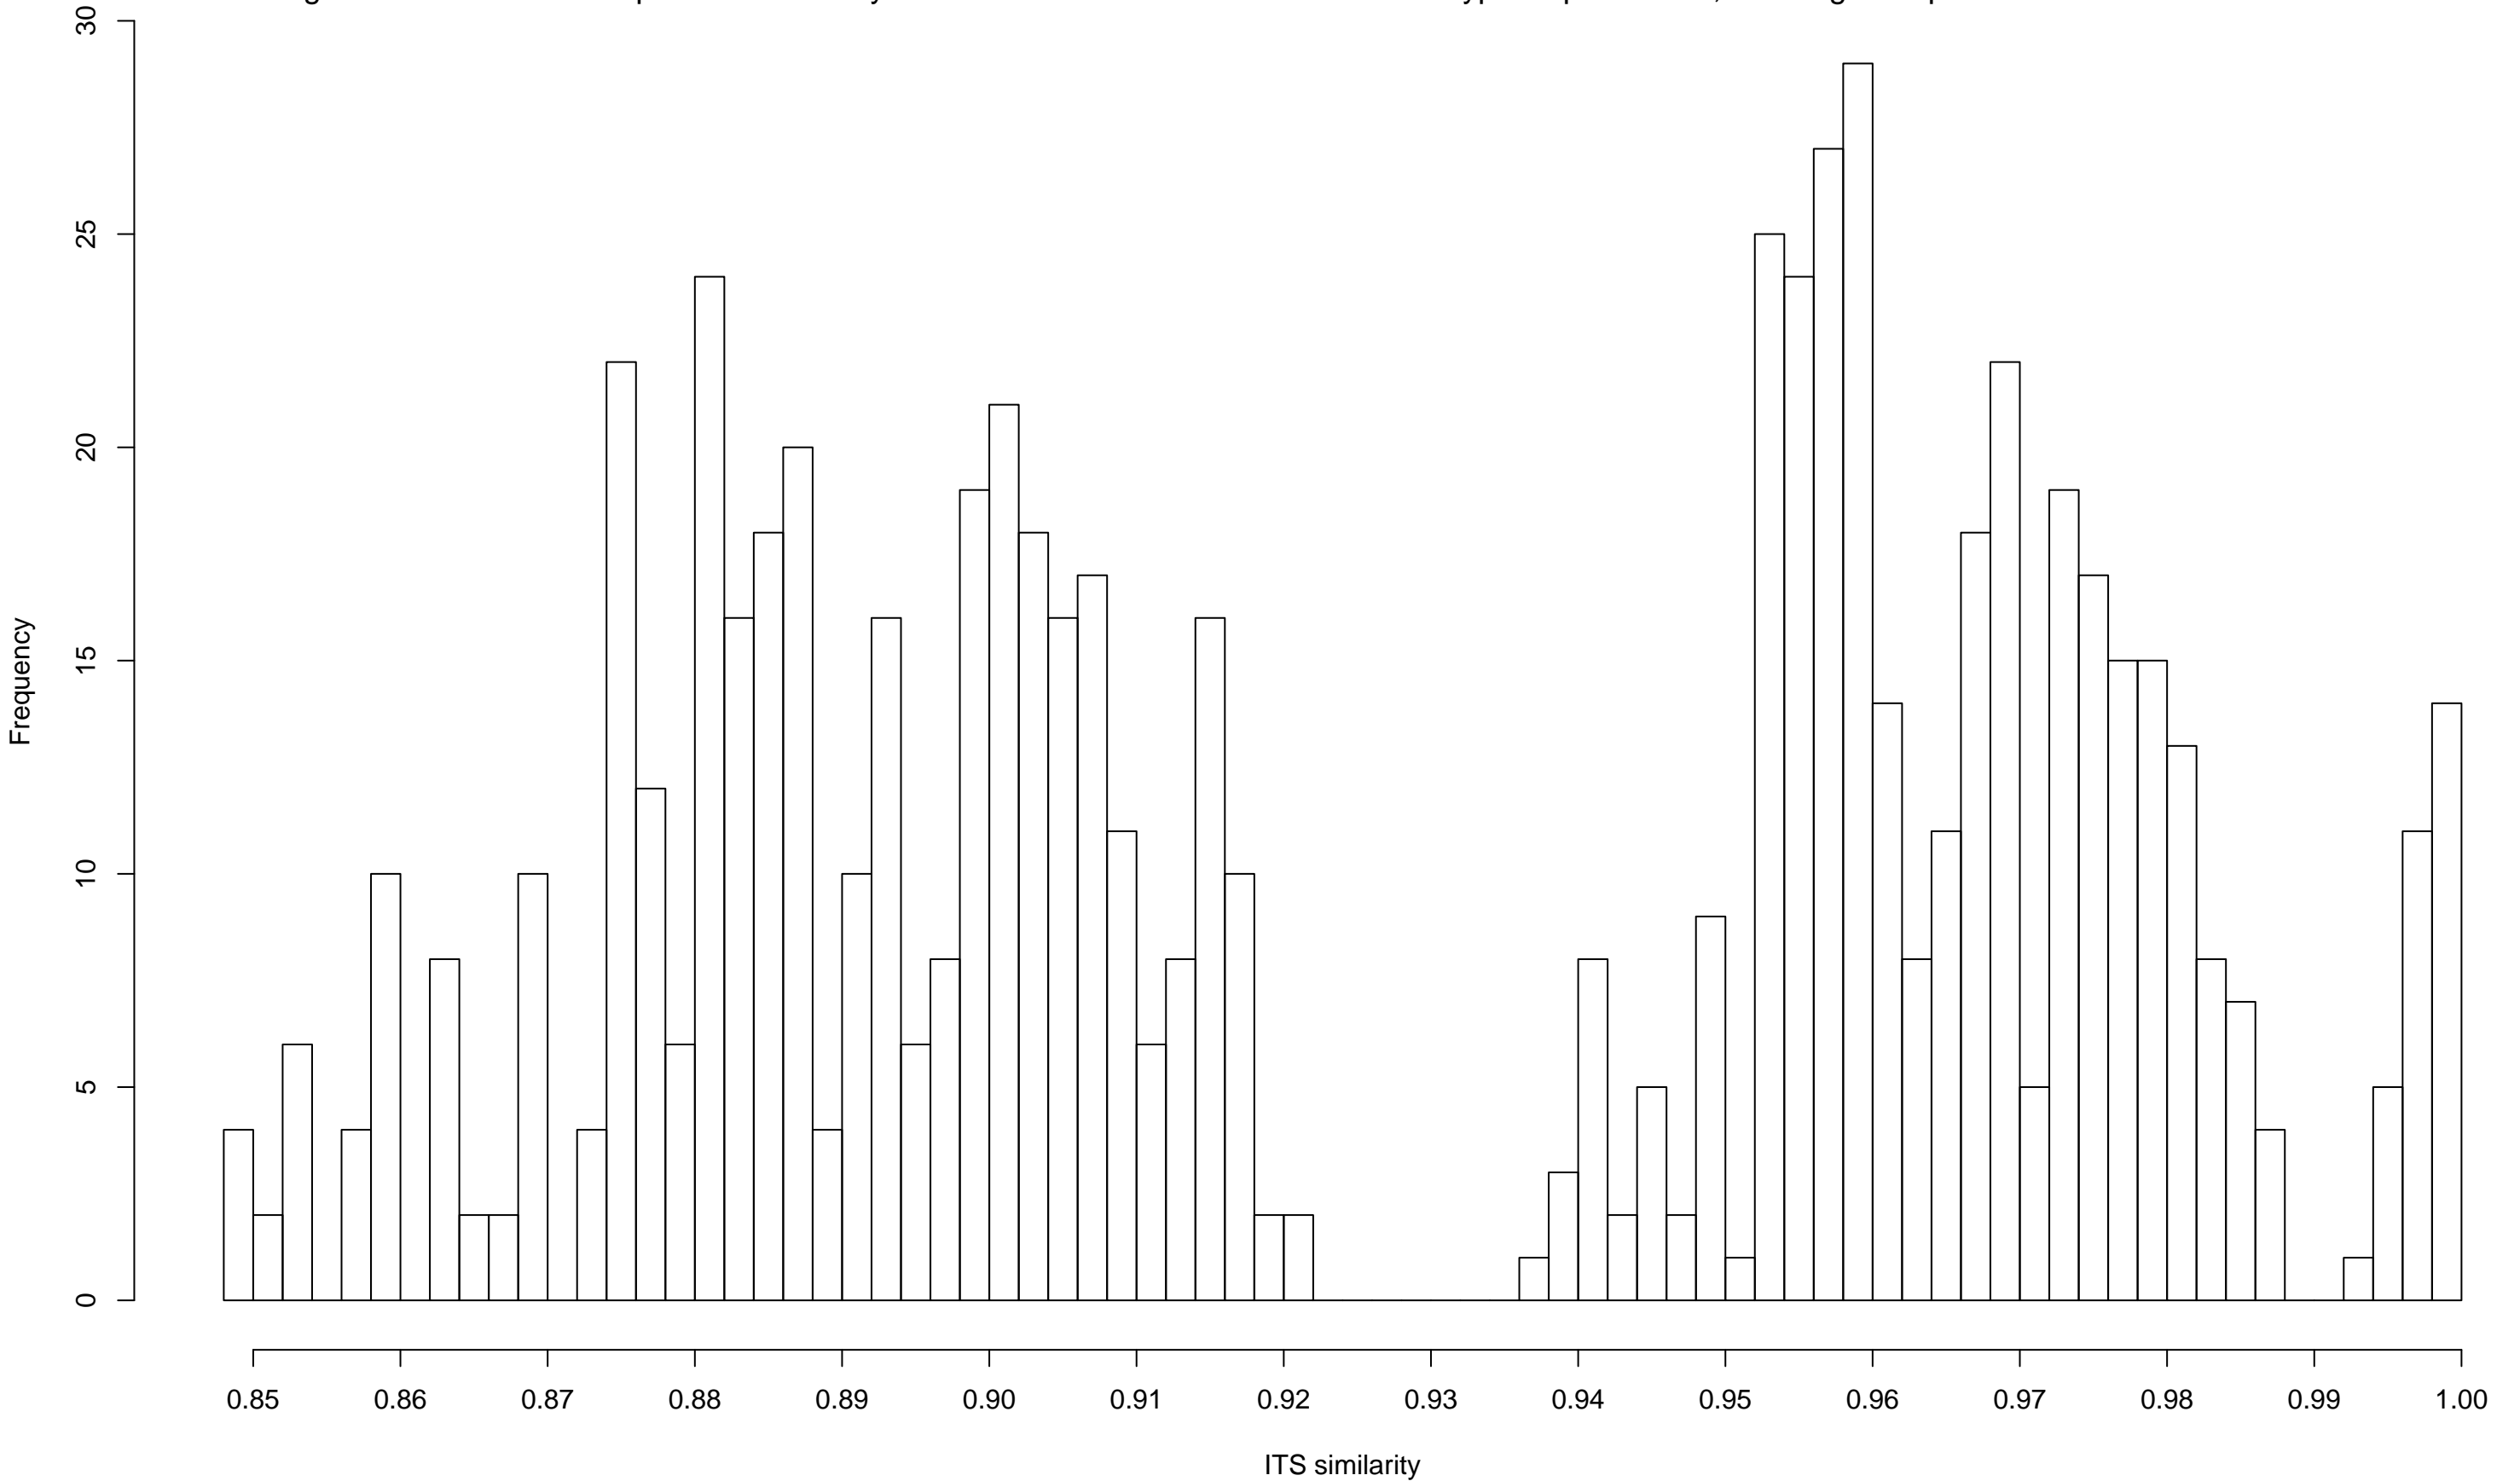

Supplement: rspb20162519supp1.pdf [file rspb20162519supp1.pdf]
